# Supplementary material for: Assessment of Patient Reported Outcomes (PROs) in Outpatients Taking Oral Anticancer Drugs Included in the Real-Life Oncoral Program
Source: MDPI journal article supplement (doi:10.3390/cancers14030660), 2022-01-28
Supplement: s1 [file s1]

**Table S1.** Number of patients reporting each symptom overall, at baseline and during each month of follow-up.

| Levels                      | Number of patients (n = 63) |       |          |       |           |       |           |       |           |       |
|-----------------------------|-----------------------------|-------|----------|-------|-----------|-------|-----------|-------|-----------|-------|
|                             | Overall                     |       | Baseline |       | 1st month |       | 2nd month |       | 3rd month |       |
|                             | All                         | 3 & 4 | All      | 3 & 4 | All       | 3 & 4 | All       | 3 & 4 | All       | 3 & 4 |
| Fatigue                     | 58                          | 28    | 51       | 15    | 56        | 20    | 30        | 7     | 22        | 4     |
| General Pain                | 52                          | 17    | 40       | 10    | 47        | 13    | 19        | 4     | 12        | 2     |
| Insomnia                    | 50                          | 14    | 34       | 8     | 42        | 12    | 18        | 5     | 13        | 1     |
| Anxious / Discouraged / Sad | 48                          | 14    | 42       | 10    | 41        | 8     | 24        | 7     | 19        | 4     |
| Memory / Concentration      | 42                          | 13    | 39       | 9     | 38        | 11    | 23        | 4     | 17        | 6     |
| Cough / Shortness of breath | 41                          | 12    | 25       | 3     | 34        | 10    | 20        | 7     | 11        | 2     |
| Numbness / Tingling         | 40                          | 6     | 25       | 3     | 32        | 5     | 21        | 1     | 11        | 1     |
| Blurred vision              | 37                          | 9     | 18       | 5     | 32        | 9     | 18        | 5     | 13        | 5     |
| Constipation                | 36                          | 12    | 25       | 6     | 33        | 10    | 16        | 2     | 9         | 3     |
| Decreased appetite          | 33                          | 5     | 20       | 2     | 26        | 5     | 13        | 0     | 9         | 0     |
| Diarrhea                    | 30                          | 4     | 15       | 1     | 24        | 2     | 6         | 1     | 5         | 0     |
| Nausea                      | 30                          | 5     | 10       | 1     | 27        | 4     | 9         | 0     | 5         | 0     |
| Rash                        | 27                          | 5     | 7        | 0     | 19        | 5     | 8         | 1     | 6         | 1     |
| Painful urination           | 14                          | 2     | 7        | 1     | 11        | 2     | 8         | 2     | 4         | 1     |
| Vomiting                    | 9                           | 2     | 4        | 0     | 7         | 2     | 3         | 0     | 1         | 0     |
| Other                       | 23                          | 9     | 7        | 3     | 21        | 9     | 11        | 4     | 7         | 2     |

Levels 3 & 4 = severe very severe symptom or frequently to almost constantly experienced symptom.

**Table S2.** Median (range) number of symptoms assessed per patient and comparison between baseline or M1 and subsequent months of follow-up.

|            | B          | M1         | p value (n=52) | B          | M2         | p value (n=29) | B          | M3        | p value (n=25) | M1         | M2         | p value (n=29) | M1         | M3        | p value (n=25) |
|------------|------------|------------|----------------|------------|------------|----------------|------------|-----------|----------------|------------|------------|----------------|------------|-----------|----------------|
| All levels | 5.5 (0-11) | 5.0 (1-11) | 0.392          | 5.0 (0-10) | 6.0 (0-10) | 0.332          | 5.0 (0-10) | 6.0 (0-9) | 0.487          | 5.0 (1-11) | 6.0 (0-10) | 0.288          | 5.0 (1-11) | 6.0 (0-9) | 0.311          |
| Levels 1-2 | 5.0 (0-10) | 5.0 (0-11) | 0.951          | 5.0 (0-8)  | 4.0 (0-10) | 0.736          | 5.0 (0-8)  | 4.0 (0-9) | 0.610          | 5.0 (0-11) | 4.0 (0-10) | 0.495          | 5.0 (0-11) | 4.0 (0-9) | 0.418          |
| Levels 3-4 | 1.0 (0-6)  | 0.0 (0-5)  | 0.095          | 0.0 (0-6)  | 0.0 (0-6)  | 0.302          | 0.0 (0-6)  | 0.0 (0-7) | 0.858          | 0.0 (0-5)  | 0.0 (0-6)  | 0.927          | 0.0 (0-5)  | 0.0 (0-7) | 0.930          |

B = Baseline; M1 = Month 1; M2 = Month 2; M3 = Month 3.

**Table S3.** Median (range) level of each symptom and comparison between baseline or M1 and subsequent months of follow-up.

|                             | B            | M1           | <i>p</i> value<br>(n=52) | B            | M2           | <i>p</i> value<br>(n=29) | B            | M3           | <i>p</i> value<br>(n=25) | M1           | M2           | <i>p</i> value<br>(n=29) | M1           | M3           | <i>p</i> value<br>(n=25) |
|-----------------------------|--------------|--------------|--------------------------|--------------|--------------|--------------------------|--------------|--------------|--------------------------|--------------|--------------|--------------------------|--------------|--------------|--------------------------|
| Fatigue                     | 2.0<br>(0-4) | 1.0<br>(0-4) | 0.010                    | 1.0<br>(0-4) | 1.0<br>(0-4) | 0.098                    | 1.0<br>(0-4) | 1.0<br>(0-4) | 0.968                    | 1.0<br>(0-4) | 1.0<br>(0-4) | 0.276                    | 1.0<br>(0-4) | 1.0<br>(0-4) | 0.331                    |
| Memory / Concentration      | 1.0<br>(0-4) | 1.0<br>(0-4) | 0.532                    | 1.0<br>(0-3) | 1.0<br>(0-3) | 1.000                    | 1.0<br>(0-3) | 1.0<br>(0-3) | 1.000                    | 1.0<br>(0-3) | 1.0<br>(0-3) | 0.299                    | 1.0<br>(0-3) | 1.0<br>(0-3) | 0.188                    |
| Anxious / Discouraged / Sad | 1.0<br>(0-4) | 1.0<br>(0-3) | 0.008                    | 1.0<br>(0-4) | 1.0<br>(0-3) | 0.188                    | 1.0<br>(0-4) | 1.0<br>(0-3) | 0.080                    | 1.0<br>(0-3) | 1.0<br>(0-3) | 0.759                    | 1.0<br>(0-3) | 1.0<br>(0-3) | 0.824                    |
| General Pain                | 1.0<br>(0-4) | 1.0<br>(0-3) | 0.179                    | 1.0<br>(0-4) | 0.0<br>(0-3) | 0.306                    | 0.0<br>(0-4) | 0.0<br>(0-4) | 0.193                    | 0.0<br>(0-3) | 0.0<br>(0-3) | 0.521                    | 0.0<br>(0-3) | 0.0<br>(0-4) | 0.330                    |
| Insomnia                    | 1.0<br>(0-4) | 0.5<br>(0-4) | 0.308                    | 1.0<br>(0-3) | 0.0<br>(0-3) | 0.158                    | 0.0<br>(0-4) | 0.0<br>(0-4) | 0.549                    | 1.0<br>(0-4) | 0.0<br>(0-3) | 0.095                    | 0.0<br>(0-4) | 0.0<br>(0-4) | 0.565                    |
| Numbness / Tingling         | 0.0<br>(0-4) | 0.0<br>(0-4) | 0.464                    | 0.0<br>(0-3) | 0.0<br>(0-4) | 0.437                    | 0.0<br>(0-4) | 0.0<br>(0-3) | 0.627                    | 0.0<br>(0-4) | 0.0<br>(0-4) | 0.821                    | 0.0<br>(0-3) | 0.0<br>(0-3) | 0.572                    |
| Cough / Shortness of breath | 0.0<br>(0-3) | 0.0<br>(0-4) | 0.237                    | 0.0<br>(0-3) | 0.0<br>(0-3) | 0.539                    | 0.0<br>(0-3) | 0.0<br>(0-3) | 0.890                    | 0.0<br>(0-4) | 0.0<br>(0-3) | 0.886                    | 0.0<br>(0-3) | 0.0<br>(0-3) | 0.244                    |
| Blurred vision              | 0.0<br>(0-4) | 0.0<br>(0-4) | 0.141                    | 0.0<br>(0-4) | 0.0<br>(0-4) | 0.177                    | 0.0<br>(0-4) | 0.0<br>(0-4) | 0.115                    | 0.0<br>(0-4) | 0.0<br>(0-4) | 1.000                    | 1.0<br>(0-4) | 0.0<br>(0-4) | 0.824                    |
| Constipation                | 0.0<br>(0-4) | 0.0<br>(0-3) | 0.332                    | 0.0<br>(0-4) | 0.0<br>(0-3) | 0.045                    | 0.0<br>(0-4) | 0.0<br>(0-3) | 0.223                    | 0.0<br>(0-3) | 0.0<br>(0-3) | 1.000                    | 0.0<br>(0-3) | 0.0<br>(0-3) | 0.374                    |
| Decreased appetite          | 0.0<br>(0-4) | 0.0<br>(0-3) | 0.740                    | 0.0<br>(0-4) | 0.0<br>(0-2) | 0.813                    | 0.0<br>(0-4) | 0.0<br>(0-2) | 0.608                    | 0.0<br>(0-2) | 0.0<br>(0-2) | 0.773                    | 0.0<br>(0-2) | 0.0<br>(0-2) | 0.665                    |
| Diarrhea                    | 0.0<br>(0-2) | 0.0<br>(0-3) | 0.675                    | 0.0<br>(0-2) | 0.0<br>(0-1) | 0.299                    | 0.0<br>(0-1) | 0.0<br>(0-2) | 0.484                    | 0.0<br>(0-2) | 0.0<br>(0-1) | 0.124                    | 0.0<br>(0-3) | 0.0<br>(0-2) | 0.203                    |
| Nausea                      | 0.0<br>(0-3) | 0.0<br>(0-3) | 0.259                    | 0.0<br>(0-2) | 0.0<br>(0-2) | 0.520                    | 0.0<br>(0-1) | 0.0<br>(0-2) | 1.000                    | 0.0<br>(0-2) | 0.0<br>(0-2) | 0.341                    | 0.0<br>(0-2) | 0.0<br>(0-2) | 0.048                    |
| Rash                        | 0.0<br>(0-2) | 0.0<br>(0-3) | 0.718                    | 0.0<br>(0-2) | 0.0<br>(0-3) | 0.746                    | 0.0<br>(0-2) | 0.0<br>(0-3) | 1.000                    | 0.0<br>(0-3) | 0.0<br>(0-3) | 1.000                    | 0.0<br>(0-3) | 0.0<br>(0-3) | 0.586                    |
| Painful urination           | 0.0<br>(0-3) | 0.0<br>(0-3) | 0.850                    | 0.0<br>(0-3) | 0.0<br>(0-3) | 0.850                    | 0.0<br>(0-2) | 0.0<br>(0-3) | 1.000                    | 0.0<br>(0-3) | 0.0<br>(0-3) | 0.346                    | 0.0<br>(0-3) | 0.0<br>(0-3) | 1.000                    |
| Vomiting                    | 0.0<br>(0-2) | 0.0<br>(0-2) | 0.773                    | 0.0<br>(0-2) | 0.0<br>(0-1) | 1.000                    | 0.0<br>(0-2) | 0.0<br>(0-2) | NA                       | 0.0<br>(0-2) | 0.0<br>(0-1) | 0.346                    | 0.0<br>(0-2) | 0.0<br>(0-2) | 1.000                    |

B = Baseline; M1 = Month 1; M2 = Month 2; M3 = Month 3; NA = not applicable.
